# Supplementary material
Source: PubMed Central journal article supplement (PMC7058093)
Supplement: NIHMS1551918-supplement-1.pdf [file NIHMS1551918-supplement-1.pdf]

## Supplemental Material

### Mutation Profiles in Glioblastoma 3D Oncospheres Modulate Drug Efficacy

By Kelli M. Wilson<sup>1</sup>, Lesley A. Mathews-Griner<sup>2</sup>, Tara Williamson<sup>1</sup>, Rajarshi Guha<sup>2</sup>, Lu Chen<sup>2</sup>, Paul Shinn<sup>2</sup>, Crystal McKnight<sup>2</sup>, Sam Michael<sup>2</sup>, Carleen Klumpp-Thomas<sup>2</sup>, Zev A. Binder<sup>3</sup>, Marc Ferrer<sup>2</sup>, Gary L. Gallia<sup>1</sup>, Craig J. Thomas<sup>2</sup>, Gregory J. Riggins<sup>1</sup>

<sup>1</sup>Department of Neurosurgery, Johns Hopkins University School of Medicine, Baltimore MD

<sup>2</sup>Division of Pre-Clinical Innovation, National Center for Advancing Translational Sciences, National Institutes of Health, Rockville MD

<sup>3</sup>Department of Neurosurgery, Perelman School of Medicine, University of Pennsylvania, Philadelphia, PA

Supplemental Table 1. Additional Oncogene and Tumor Suppressor Mutation Status

| <b>Gene Symbol</b> | <b>Oncosphere Cell Line Mutational Status</b> |
|--------------------|-----------------------------------------------|
| <i>APC</i>         | None                                          |
| <i>BRAF</i>        | None                                          |
| <i>BRCA1</i>       | None                                          |
| <i>BRCA2</i>       | None                                          |
| <i>CTNNB1</i>      | None                                          |
| <i>ERBB2</i>       | None                                          |
| <i>HRAS</i>        | None                                          |
| <i>FLT3</i>        | None                                          |
| <i>KIT</i>         | None                                          |
| <i>KRAS</i>        | JHH-520: WT/M75I                              |
| <i>MAP2K4</i>      | None                                          |
| <i>MET</i>         | None                                          |
| <i>NRAS</i>        | JHH-68: WT/T74I                               |
| <i>PDGFRA</i>      | None                                          |
| <i>RET</i>         | None                                          |
| <i>SMAD4</i>       | None                                          |
| <i>STK11</i>       | None                                          |
| <i>VHL</i>         | None                                          |

Supplemental Table 2. Comparison of Oncosphere Panel Mutations to Previous Studies

| <b>GBM<br/>CAN<br/>Genes</b> | <b>Parsons<br/>et al,<br/>2008+</b> | <b>TCGA,<br/>2008<sup>^</sup></b> | <b>TCGA,<br/>2013</b> | <b>Common<br/>2D GBM<br/>cell lines<sup>§</sup></b> | <b>Current<br/>Study<sup>*</sup></b> |
|------------------------------|-------------------------------------|-----------------------------------|-----------------------|-----------------------------------------------------|--------------------------------------|
| <i>CDKN2A</i>                | 50%                                 | 52%                               | 61%                   | 75%                                                 | 77%                                  |
| <i>TP53</i>                  | 40%                                 | 35%                               | 28%                   | 100%                                                | 44%                                  |
| <i>EGFR</i>                  | 37%                                 | 45%                               | 57%                   | 12.5%                                               | 22%                                  |
| <i>PTEN</i>                  | 30%                                 | 36%                               | 41%                   | 37.5%                                               | 66%                                  |
| <i>NF1</i>                   | 15%                                 | 18%                               | 10%                   | 25%                                                 | 44%                                  |
| <i>CDK4</i>                  | 14%                                 | 18%                               | 14%                   | 0%                                                  | 0%                                   |
| <i>RB1</i>                   | 12%                                 | 11%                               | 7.6%                  | 12.5%                                               | 22%                                  |
| <i>IDH1</i>                  | 11%                                 | ND                                | 6%                    | 0%                                                  | 0%                                   |
| <i>PIK3CA</i>                | 10%                                 | 15%**                             | 25%**                 | 12.5%                                               | 0%                                   |
| <i>PIK3R1</i>                | 8%                                  | 15%**                             | 25%**                 | 12.5%                                               | 11%                                  |

+ Only heterozygous and homozygous point mutations, homozygous deletions and amplifications greater than 12 copies were assessed.

<sup>^</sup> Only heterozygous and homozygous point mutations, homozygous deletions and amplifications greater than 5.65 copies were assessed.

<sup>§</sup> Cell lines assessed are U87MG, LN-229, and all 6 CNS lines present in the NCI-60 collection

<sup>\*</sup> Only heterozygous and homozygous point mutations, homozygous deletions, and amplifications greater than 10 copies were assessed.

<sup>\*\*</sup> Reported values are combined for PIK3CA and PIK3R1 so the individual gene percentage is not known.

Supplemental Table 3. Genetic alterations present in both Br23X (xenograft) and Br23C (cell line)

| <b>Gene Name</b> | <b>Amino Acid Change</b> |
|------------------|--------------------------|
| <i>GPR85</i>     | T352P                    |
| <i>HIVEP1</i>    | F1388L                   |
| <i>DIMT1L</i>    | E85K                     |
| <i>LMX1A</i>     | C26Y                     |
| <i>MPZ</i>       | Y187C                    |
| <i>NF1</i>       | I526S                    |
| <i>PDIA2</i>     | R303C                    |
| <i>SLC9A2</i>    | R160H                    |
| <i>SNRPA</i>     | G99D                     |
| <i>TACC3</i>     | E680K                    |
| <i>TNMD</i>      | D167Y                    |
| <i>TP53</i>      | C176F                    |
| <i>PTEN</i>      | Homozygous Deletion      |

Supplemental Figure 1. Antibody arrays of phosphokinase protein expression and dot quantitation in JHH-136 and JHH-520

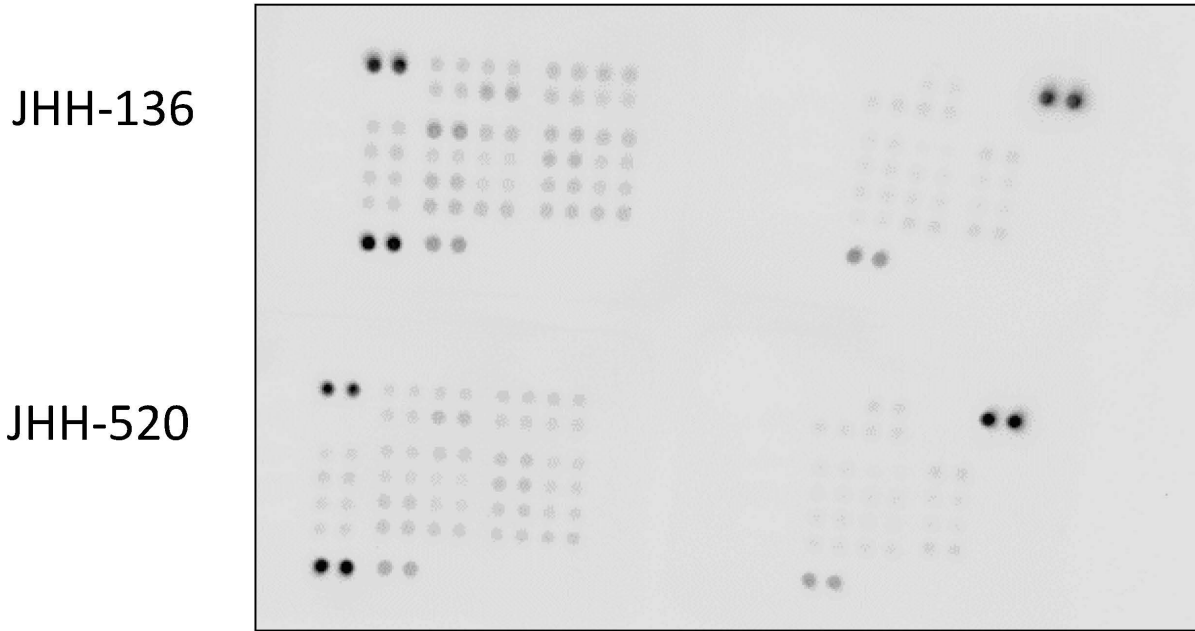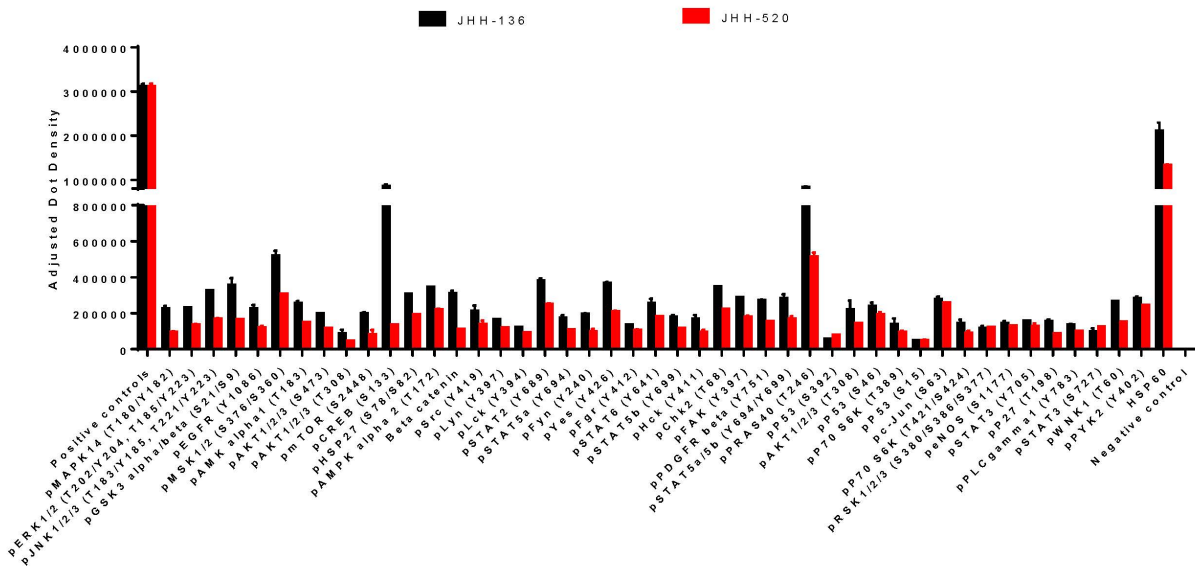

Phosphokinase array were done for JHH-136 and JHH-520. The top image shows the signal after a 10 second exposure. Dot density was quantitated and normalized to the positive controls and background. Results are shown here in bar graph.

## Supplemental Figure 2. Activity of individual compounds across multiple GBM cell lines

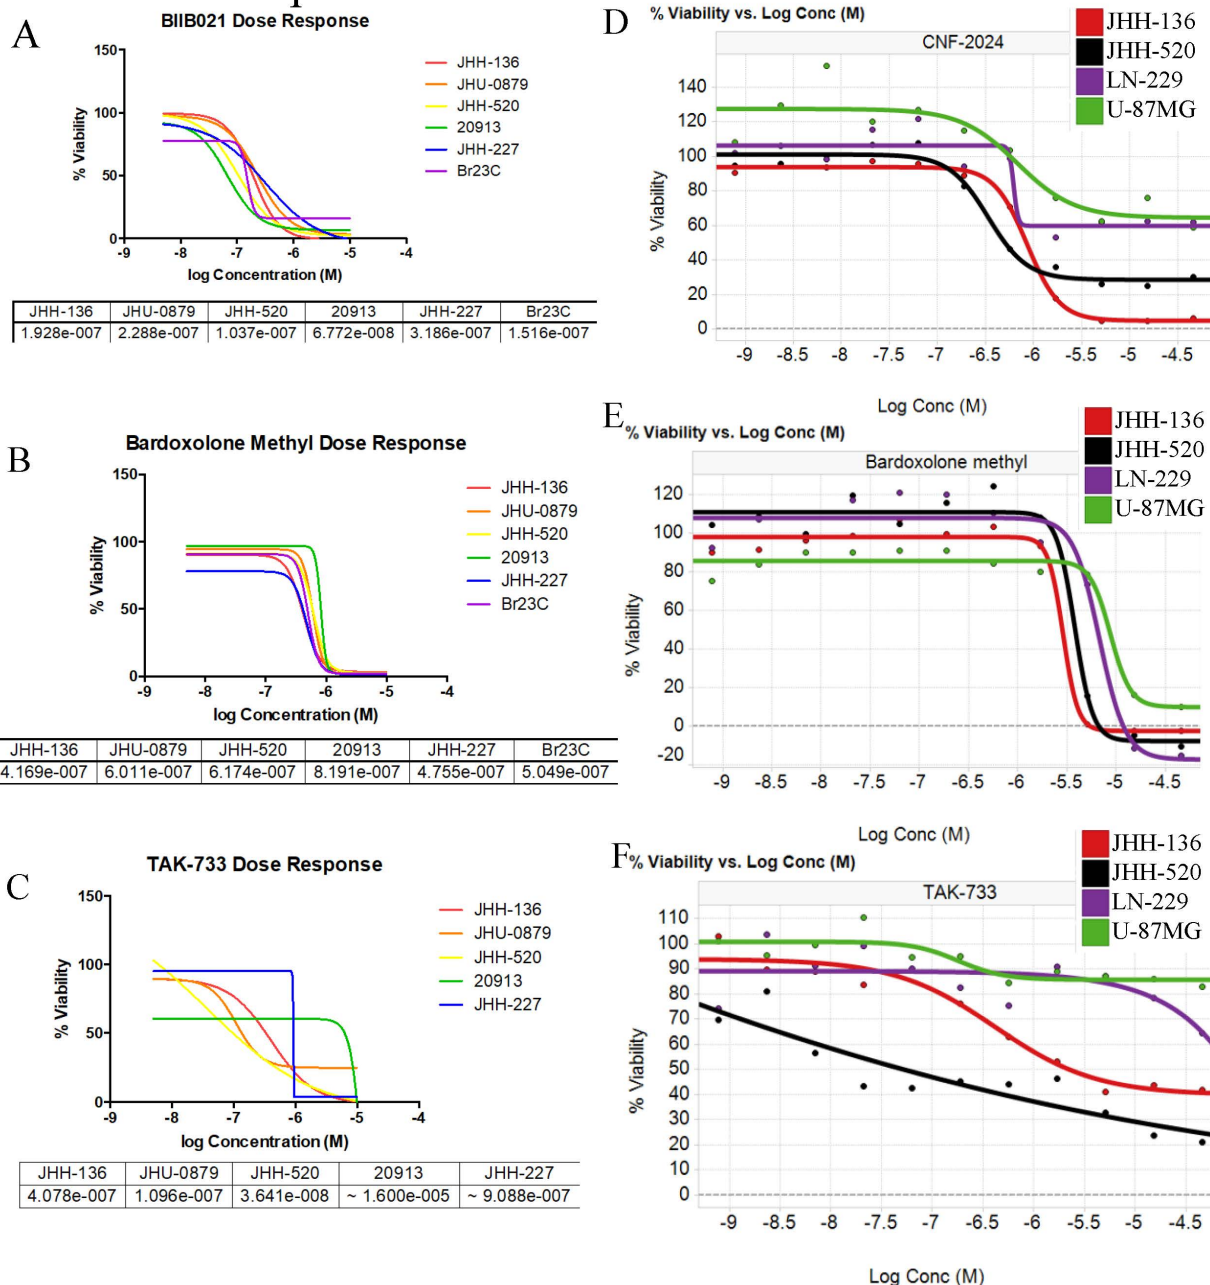

Dose response curves of cell viability across multiple GBM cell lines. 6 GBM oncosphere cell lines were tested against BIIB021 (CNF-2024), Bardoxolone methyl and TAK-733 in Figure 2A-C using an alamarBlue assay. The same three compounds were included in the qHTS screen as shown in Figure 2D-F using a CellTiter-Glo assay.

Supplemental Table 4. Compounds selected for 6x6 Drug combination screening

| <b>Drug Name</b>   | <b>Gene Target</b> | <b>Activity profile</b> |
|--------------------|--------------------|-------------------------|
| Cladribine         | <i>ADA</i>         | JHH-136 specific        |
| SR-3306            | <i>MAPK8</i>       | Pan-active              |
| AZD-8055           | <i>MTOR</i>        | Inactive                |
| Pelitinib          | <i>EGFR</i>        | Inactive                |
| OSI-027            | <i>MTOR</i>        | Inactive                |
| TAK-733            | <i>MAP2K1</i>      | JHH-520 specific        |
| NCGC00161703       | <i>NFKB1</i>       | Pan-active              |
| CNF-2024           | <i>HSP90AB1</i>    | Pan-active              |
| Carfilzomib        | <i>PSMD</i>        | JHH-136 specific        |
| ABT-263            | <i>BCL2L1</i>      | Inactive                |
| Trametinib         | <i>MAP2K1</i>      | Pan-active              |
| GSK-2126458        | <i>PIK3CA</i>      | Pan-active              |
| Topotecan          | <i>TOP1</i>        | JHH-136 specific        |
| Combrestatin A-4   | <i>TUBB</i>        | Inactive                |
| Plinabulin         | <i>TUBB</i>        | Inactive                |
| Doxorubicin        | <i>TOP2A</i>       | Pan-active              |
| GDC-0980           | <i>MTOR</i>        | Pan-active              |
| Podofilox          | <i>IGFR1</i>       | Inactive                |
| JK 184             | <i>ADH7</i>        | Inactive                |
| Mebendazole        | <i>TUBB</i>        | Inactive                |
| Flavopiridol       | <i>CDK1</i>        | Pan-active              |
| Rotenone           | <i>NDUFAF1</i>     | JHH-520 selective       |
| Panobinostat       | <i>HDAC1</i>       | Pan-active              |
| Fenretinide        | <i>RARB</i>        | Pan-active              |
| Obatoclox          | <i>BCL2L1</i>      | Pan-active              |
| GDC-0941           | <i>PIK3CA</i>      | Pan-active              |
| Artemimol          | <i>N/A</i>         | Pan-active              |
| Bardoxolone methyl | <i>NFKB1</i>       | Pan-active              |
| PAC-1              | <i>CASP3</i>       | Inactive                |
| MLN-2238           | <i>PSMD1</i>       | Pan-active              |

## Supplementary Table 5. Combinations selected for 10x10 Drug combination screening

| <b>Drug Name A</b>   | <b>Drug Name B</b> | <b>Drug Name A</b> | <b>Drug Name B</b> |
|----------------------|--------------------|--------------------|--------------------|
| OSI-027              | Mebendazole        | CNF-2024           | PAC-1              |
| Bardoxolone methyl   | Carfilzomib        | Trametinib         | PAC-1              |
| Bardoxolone methyl   | GSK-2126458        | Obatoclox          | Cladribine         |
| CNF-2024             | Bardoxolone methyl | CNF-2024           | Obatoclox          |
| SR-3306              | Carfilzomib        | Mebendazole        | Obatoclox          |
| SR-3306              | Trametinib         | Obatoclox          | Obatoclox          |
| SR-3306              | PAC-1              | CNF-2024           | Cladribine         |
| Marizomib            | Cladribine         | CNF-2024           | Trametinib         |
| Marizomib            | Trametinib         | CNF-2024           | GSK-2126458        |
| GSK-2126458          | Marizomib          | Mebendazole        | Cladribine         |
| Pictilisib           | Obatoclox          | Mebendazole        | Mebendazole        |
| Pictilisib           | Mebendazole        | GSK-2126458        | Cladribine         |
| CNF-2024             | Pictilisib         | GSK-2126458        | Trametinib         |
| Pelitinib            | Cladribine         | GSK-2126458        | GSK-2126458        |
| Pelitinib            | Trametinib         | Trametinib         | Cladribine         |
| Pelitinib            | Obatoclox          | Trametinib         | Trametinib         |
| Pelitinib            | Mebendazole        | Cladribine         | Cladribine         |
| AZD-8055             | Cladribine         |                    |                    |
| AZD-8055             | Trametinib         |                    |                    |
| AZD-8055             | Obatoclox          |                    |                    |
| AZD-8055             | Mebendazole        |                    |                    |
| Navitoclax (ABT-263) | Cladribine         |                    |                    |
| Navitoclax (ABT-263) | Trametinib         |                    |                    |
| Navitoclax (ABT-263) | GSK-2126458        |                    |                    |
| Navitoclax (ABT-263) | Mebendazole        |                    |                    |
| Cladribine           | Carfilzomib        |                    |                    |
| GSK-2126458          | Carfilzomib        |                    |                    |
| Carfilzomib          | PAC-1              |                    |                    |
| GSK-2126458          | PAC-1              |                    |                    |
| Cladribine           | PAC-1              |                    |                    |
